# Supplementary material for: Effective enhancement of Pseudomonas stutzeri D-phenylglycine aminotransferase functional expression in Pichia pastoris by co-expressing Escherichia coli GroEL-GroES
Source: PubMed Central journal article supplement (PMC3503884; doi:10.1186/1475-2859-11-47), 2012-04-19

**A**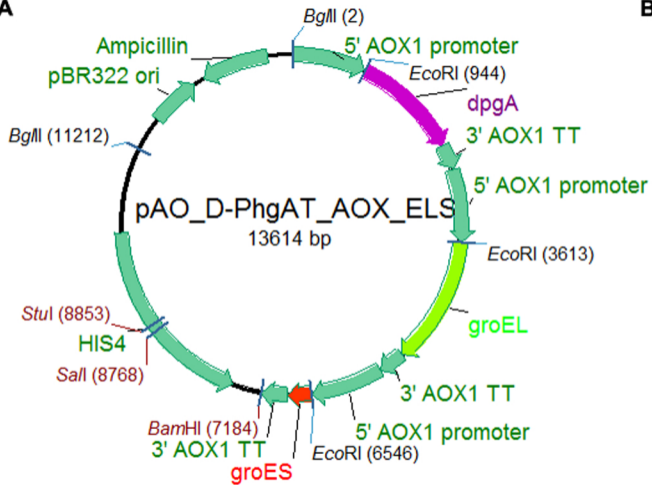**B**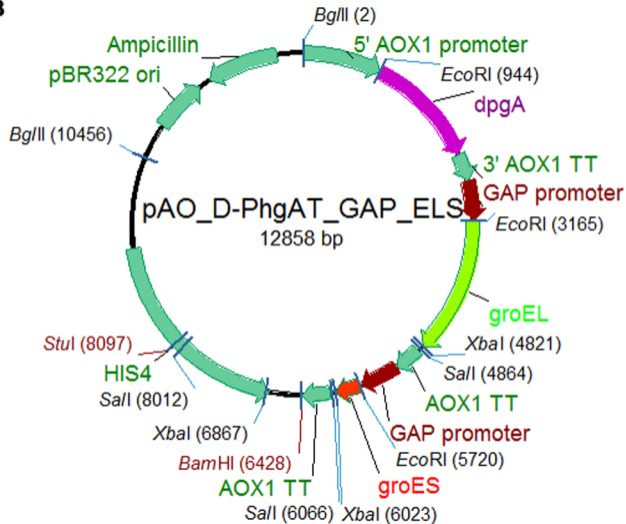

Supplement: 1475-2859-11-47-S1.pdf [file 1475-2859-11-47-S1.pdf]
