# Supplementary material for: Effective enhancement of Pseudomonas stutzeri D-phenylglycine aminotransferase functional expression in Pichia pastoris by co-expressing Escherichia coli GroEL-GroES
Source: PubMed Central journal article supplement (PMC3503884; doi:10.1186/1475-2859-11-47), 2012-04-19

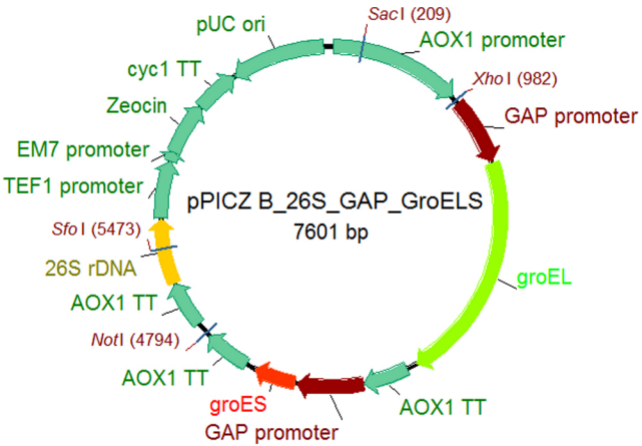

Supplement: 1475-2859-11-47-S2.pdf [file 1475-2859-11-47-S2.pdf]
