# Supplementary material for: Effective enhancement of Pseudomonas stutzeri D-phenylglycine aminotransferase functional expression in Pichia pastoris by co-expressing Escherichia coli GroEL-GroES
Source: PubMed Central journal article supplement (PMC3503884; doi:10.1186/1475-2859-11-47), 2012-04-19
Supplement: 1475-2859-11-47-S3.pdf [file 1475-2859-11-47-S3.pdf]

|          |     |                                                               |
|----------|-----|---------------------------------------------------------------|
| WT_dpgA  | 1   | ATGTCGATCCTTAACGACTACAAACGTAAGACAGAAGGCTCAGTATTGTGGGCACAACGC  |
| OPT_dpgA | 1   | ATGTCATCCTGAACGACTACAAAGAAAGACTGAGGGTCTGTCTTCGGGGTCAACGCT     |
|          |     | M S I L N D Y K R K T E G S V F W A Q R                       |
| WT_dpgA  | 61  | GCTCGGTCCGGTCATGCCCGACGGCGTAACCGCAGACACCCGAGTATTGACCACACACGGC |
| OPT_dpgA | 61  | GCTCGTCTGTGTCATGCCGTGATGGAGTTACTGCCGATACAGAGTCTTCGATCCACACGGT |
|          |     | A R S V M P D G V T A D T R V F D P H G                       |
| WT_dpgA  | 121 | CTTTTCATTAGTGACGCCCAAGGCGTTTCAAGACCGATGTAGACGGCAATGTGTACCTA   |
| OPT_dpgA | 121 | TTGTTTCATCTCTGACGCTCAAGGAGTTTCAAGACGACGTCGATGGTAACTTTTACTTG   |
|          |     | L F I S D A Q G V H K T D V D G N V Y L                       |
| WT_dpgA  | 181 | GACTTTTTCGGGGCACGGAGCCCTCGTACTAGGTCATGCCCATCCTCCGGTTAACGCA    |
| OPT_dpgA | 181 | GACTTCTTCGGTGGTCACGGTGTCTGCTTGGGTCATGGTTCATCCTCCGTGTCAACGCC   |
|          |     | D F F G G H G A L V L G H G H P R V N A                       |
| WT_dpgA  | 241 | GCATCGCCGAAGCTCTTAGCCATGGCGTCCAGTACCGGCCAGCCACCAGCTGGAAGTG    |
| OPT_dpgA | 241 | GCTATTCGTCGAGCTCTGTCACCGGTGTCAGTACCGTGCCTTCTCATCCTCTGGAAGGT   |
|          |     | A I A E A L S H G V Q Y A A S H P L E V                       |
| WT_dpgA  | 301 | CGATGGGCAAGACGCATCGTGCCGCAATTCCCTCAATTCGTAAACGCTTCACCGGA      |
| OPT_dpgA | 301 | AGATGGGCGAGAGAAATCGTTGCTGCTTTCCCTTCCATCCGTAAGTTGAGATTCACTGGA  |
|          |     | R W A E R I V A A F P S I R K L R F T G                       |
| WT_dpgA  | 361 | AGCGGCACCGAAACTACGCTGCTGGCTTTGCGGTAGCTCGTGCCTTCACGGGCCCGCC    |
| OPT_dpgA | 361 | TCTGGTACTGAGACTACCCTGTTGGCCCTTGAAGTGTCTAGAGCTTTCACCTGGTAGACGT |
|          |     | S G T E T T L L A L R V A R A F T G R R                       |
| WT_dpgA  | 421 | ATGATACTGCGCATCGCCACTCATTATCATGGCTGGCACGATTTTCCCGAFTCGTTAT    |
| OPT_dpgA | 421 | ATGATTTTGAATAATCGCTACTCATTACCACGGTGGCACGATTTTCCCGCCTCGTTAC    |
|          |     | M I L R I A T H Y H G W H D F S A S G Y                       |
| WT_dpgA  | 481 | AACAGCCATTTCGATGGCCAGCCGGCCGGGGCTGCTACCTGAAATTCGAAGAACTACT    |
| OPT_dpgA | 481 | AACCTCCACTTCGACGGTCAGCCTGCTCCAGGTGTCTTGCAGAAATCGCCAGAACTACT   |
|          |     | N S H F D G Q P A P G V L P E I A K N T                       |
| WT_dpgA  | 541 | TTGCTGATTCCGCTCTGATGATATGAAGGCATGCGAGAAAGTTTTCGGCAGCATGGCAGC  |
| OPT_dpgA | 541 | CTGTTGATTCCGCTCTGACGATCGAGGGTATGAGAGAGTTTTCGGTCAACATGGATCT    |
|          |     | L L I R P D D I E G M R E V F A Q H G S                       |
| WT_dpgA  | 601 | GACATTCGAGCATTTCATGTCGAACCTGTGGGTTCGCACCTTGGCGTCACTCCAGTGAGC  |
| OPT_dpgA | 601 | GACATCGCTGCCCTTCATCGCTGAACCAAGTTGGATTCACCTTCGGTGTACTCCAGTCTCT |
|          |     | D I A A F I A E P V G S H F G V T P V S                       |
| WT_dpgA  | 661 | GATAGCTTCTACCGAAGGCGAGAATTGGCTCGGCAATACGGTGCCTGTTCATCCTA      |
| OPT_dpgA | 661 | GACTCCTTCTGAGAGAGGGTGTGAATTGGCTAGACAGTACGGTGTCTGTTCATCCTT     |
|          |     | D S F L R E G A E L A R Q Y G A L F I L                       |
| WT_dpgA  | 721 | GACGAAAGTAATTTCTGGTTTCCGGTCCGGAAATCAGGAATGCAGGGCTCCTTGATGTT   |
| OPT_dpgA | 721 | GACGAGGTATCTCCGGAATCCGTTGTCCGTTAACTATGGTATGCAGGGCTTGTCTGAGC   |
|          |     | D E V I S G F R V G N H G M Q A L L D V                       |
| WT_dpgA  | 781 | CAGCCGGATCTCACCTGCTGGCTAAGGCCAGCGCAGGCGGGCTTCCCGCTGGCATCTTG   |
| OPT_dpgA | 781 | CAGCCAGATTTGACTTGTGGCTAAGGCCCTCTGCCGAGGAACTTCCAGGAGGTATCTTG   |
|          |     | Q P D L T C L A K A S A G G L P G G I L                       |

|          |      |                                                             |                                     |
|----------|------|-------------------------------------------------------------|-------------------------------------|
| WT_dpgA  | 841  | GGCGGGCGCGGAAGATGTCATGGGAGTTCCTCAGCCGAGGCAGTGA              | TCCCAAGGTACTACAT                    |
| OPT_dpgA | 841  | GGAGGTAGAGAAGATGTCATGGGAGTCTTGTC                            | CCGTGGTTCCGACCGTAAAGTCTTGCAT        |
|          |      | G G R E D V M G V L S R G S D R K V L H                     |                                     |
| WT_dpgA  | 901  | CAGGGTACTTTTACC                                             | CGCAACCCGATTACTTGC                  |
| OPT_dpgA | 901  | CAAGGTACTTTTACC                                             | CGGAAATCCTATCACCGCCGCTGCTGCCATCGTGC |
|          |      | Q G T F T G N P I T A A A A I A A I D T                     |                                     |
| WT_dpgA  | 961  | ATCCTTGAAGACGATGTTTTCGCGAAGATCAATGACCTTGGTCAATTCGCCAGGAGGCG |                                     |
| OPT_dpgA | 961  | ATCTTGGAGGATGACGTTTTCGCTAAGATTAACGACTTGGTCAATTCGCCAGAGAAGCT |                                     |
|          |      | I L E D D V C A K I N D L G Q F A R E A                     |                                     |
| WT_dpgA  | 1021 | ATGAATCACTAATTGTC                                           | CCGAAGGGA                           |
| OPT_dpgA | 1021 | ATGAATCACTTGTTCGCTAGAAAGGGTCTGA                             | ACTGGTTGGCTTACGGTACATTCTCCGGA       |
|          |      | M N H L F A R K G L N W L A Y G R F S G                     |                                     |
| WT_dpgA  | 1081 | TTCCACCTGATGCCGGGCTGCCACCTAA                                | TACAACCGACACCGGCTCCATAACCCGAGCT     |
| OPT_dpgA | 1081 | TTCCATCTGATGCCTGGTTTGCCACCTAACACCAC                         | TGATACCGGTTCCATCACCTCGTGC           |
|          |      | F H L M P G L P P N T T D T G S I T R A                     |                                     |
| WT_dpgA  | 1141 | GAAGTCGCAACGCCCGATGTGAAGATGATCGCAGCAATGCCCATGGCA            | TTGATATTGGAA                        |
| OPT_dpgA | 1141 | GAAGTCGCTAGACCTGACGTTAAGATGATCGCCGCTATGAGAA                 | TGGCCTTGATCCTGGAG                   |
|          |      | E V A R P D V K M I A A M R M A L I L E                     |                                     |
| WT_dpgA  | 1201 | GGTGTGGATATCGGCGGGCGGGTCAAGTTTTCCTGTCAGCACGCA               | TGAACCCGAACAT                       |
| OPT_dpgA | 1201 | GGTGTGATCATTGGTGGTAGAGGTTCCGTCTTCCTGTCCGCC                  | CAACACGAACCGTGA                     |
|          |      | G V D I G G R G S V F L S A Q H E R E H                     |                                     |
| WT_dpgA  | 1261 | GTGAGCATCTGGTGACAACCTTTGATCGCGTATTAGACCGCC                  | TGGCGGACGAAACCTG                    |
| OPT_dpgA | 1261 | GTGGAACACCTTGTCAACACTTTTCGATAGAGTCTGGATCGTT                 | TGGCCGATGAGAACCTG                   |
|          |      | V E H L V T T F D R V L D R L A D E N L                     |                                     |
| WT_dpgA  | 1321 | TTGTCTTGGCAACCAACTAATTTGTCTGGAAACCAATCATGA                  | -----                               |
| OPT_dpgA | 1321 | CTGTCTTGGCAACCAACTAACTTTGTCTGGTAACCAATCCAT                  | CACCATCACCATCACTGC                  |
|          |      | L S W Q P T N L S G N Q S H H H H H H C                     |                                     |
| WT_dpgA  | 1362 | ---                                                         |                                     |
| OPT_dpgA | 1381 | TAA                                                         |                                     |
|          |      | *                                                           |                                     |
